# Supplementary material
Source: publisher figshare collection journal article supplement (https://sage.figshare.com/ndownloader/files/23727758)
Supplement: Supplementary file 1 [file 23727758]

**Supplemental Table 2: Distribution of Clients According to Educational Level and Nationality**

|                                     | 2009-2017      |              |                |                  |
|-------------------------------------|----------------|--------------|----------------|------------------|
|                                     | Total          | HIV positive | HIV negative   | p-value          |
| <b>Nationality</b>                  |                |              |                |                  |
| Spain                               | 16175 (62.41%) | 715 (52.38%) | 15460 (62.97%) | <b>&lt;0.001</b> |
| <i>Occidental Europe</i>            | 3393 (13.09%)  | 158 (11.58%) | 3235 (13.18%)  |                  |
| <i>Eastern Europe</i>               | 493 (1.90%)    | 35 (2.56%)   | 458 (1.87%)    |                  |
| <i>Center and South America</i>     | 4540 (17.52%)  | 388 (28.42%) | 4152 (16.91%)  |                  |
| <i>North America and Oceania</i>    | 467 (1.80%)    | 21 (1.54%)   | 446 (1.82%)    |                  |
| <i>Asia</i>                         | 302 (1.17%)    | 13 (0.95%)   | 289 (1.18%)    |                  |
| <i>Middle East</i>                  | 180 (0.69%)    | 11 (0.81%)   | 169 (0.69%)    |                  |
| <i>Sub-Saharan and North Africa</i> | 191 (0.74%)    | 13 (0.95%)   | 178 (0.73%)    |                  |
| <i>No answer</i>                    | 175 (0.68%)    | 11 (0.81%)   | 164 (0.67%)    |                  |
| <b>Educational level</b>            |                |              |                |                  |
| <i>Pre-primary education</i>        | 57 (0.22%)     | 2 (0.15%)    | 55 (0.22%)     | <b>&lt;0.001</b> |
| <i>Primary education</i>            | 932 (3.60%)    | 52 (3.81%)   | 880 (3.58%)    |                  |
| <i>Secondary educational</i>        | 8698 (33.56%)  | 384 (28.13%) | 8314 (33.86%)  |                  |
| <i>University</i>                   | 13805 (53.27%) | 486 (35.60%) | 13319 (54.25%) |                  |
| <i>No answer</i>                    | 2424 (9.35%)   | 441 (32.31%) | 1983 (8.08%)   |                  |
